# Financing Essential HIV Services: A New Economic Agenda

Anna Vassall<sup>1\*</sup>, Michelle Remme<sup>1</sup>, Charlotte Watts<sup>1</sup>, Timothy Hallett<sup>2</sup>, Mariana Siapka<sup>1</sup>, Peter Vickerman<sup>1</sup>, Fern Terris-Prestholt<sup>1</sup>, Markus Haacker<sup>3</sup>, Lori Heise<sup>1</sup>, Andy Haines<sup>3</sup>, Rifat Atun<sup>2,4</sup>, Peter Piot<sup>5</sup>

**1** SAME Modelling and Economics, Department of Global Health and Development, London School of Hygiene & Tropical Medicine, London, United Kingdom, **2** Imperial College, London, United Kingdom, **3** Faculty of Public Health and Policy, London School of Hygiene & Tropical Medicine, London, United Kingdom, **4** Harvard School of Public Health, Harvard University, Boston, Massachusetts, United States of America, **5** London School of Hygiene & Tropical Medicine, London, United Kingdom

## The Need for Innovative Sustainable Financing of the HIV Response

Despite increasing optimism, the end of AIDS is not in sight. Whereas in 1990, HIV/AIDS ranked 24th out of the top 25 causes of years of life lost globally, in 2010 it ranked sixth [1]. In 2011, an estimated 1.7 million people died of AIDS-related causes and 2.5 million were newly infected with the virus; and the number of people living with HIV continues to outgrow the financial and human resources currently allocated to treat them [2]. While the need for HIV services increases, health system constraints limit many countries' ability to meet targets for scaling up core HIV services [2]. Considerable demand-side barriers remain, as evidenced by the limited uptake of male circumcision [3]. Structural factors, including poverty, stigma, and gender inequality continue to underpin HIV vulnerability [4].

Sustainable financing is essential for an expanded HIV response. UNAIDS has recently estimated that the cost of achieving universal access to HIV prevention, treatment, care, and support in 2015 will be US\$22 billion [5]. Future treatment costs remain unaddressed with short-term funding cycles. There is a moral obligation to maintain treatment for those who need it, and considerable resources have been implicitly pre-committed to lifelong HIV treatment and care. In countries such as Swaziland and Uganda, the fiscal liability the commitment to lifelong treatment creates is substantial—and for the next two decades may be up to three times annual gross domestic product (GDP) [6].

The Policy Forum allows health policy makers around the world to discuss challenges and opportunities for improving health care in their societies.

## Options and Opportunities Domestic Revenues

In most low- and middle-income countries, domestic financing is pivotal to funding the HIV response. While external financing accounts for two-thirds of HIV investment in sub-Saharan Africa, more than two-thirds of general health expenditure is financed from domestic sources, funding the health systems upon which HIV services rely [7]. However, the amount of revenue governments can raise from taxes is constrained due to the risk of excessive taxation dampening nascent economic growth. It can therefore be challenging to identify additional domestic budgetary flexibility for investments in HIV, without compromising fiscal stability [8].

Nevertheless, there is potential from the positive economic growth and rising domestic tax revenues forecast in a number of sub-Saharan African countries [9]. For example, Zambia's 5% projected per capita annual GDP growth rate between 2011 and 2017 may generate up to an additional US\$21.8 per capita in health expenditures, based on Zambia's current per capita domestic health expenditure of US\$63.48 [10]. Of course, such gains will not be possible for all—for

example Swaziland's  $-0.1\%$  projected annual GDP growth rate over the same period offers limited potential for increased health spending. But, even in those countries with slow economic growth, there may be room to increase tax revenues, with many countries still being well below the minimum International Monetary Fund (IMF) benchmark level of 15% of GDP for low-income countries (see Figure 1) [11]. External borrowing can also generate revenue, particularly where there are economic returns to HIV programmes [12]. However, for many low-income countries with high debt-to-GDP ratios, the room to absorb additional lending remains limited [8].

## External Financing

Economic constraints in high-income countries appear to be resulting in a flatlining of development assistance to health (DAH) [13]. Non-health development priorities are dominating the post-2015 agenda for sustainable development, with only one out of 11 thematic groups addressing health [14]. Moreover, the value of providing development assistance to middle-income countries is being challenged, leaving some high-prevalence

**Citation:** Vassall A, Remme M, Watts C, Hallett T, Siapka M, et al. (2013) Financing Essential HIV Services: A New Economic Agenda. *PLoS Med* 10(12): e1001567. doi:10.1371/journal.pmed.1001567

**Published:** December 17, 2013

**Copyright:** © 2013 Vassall et al. This is an open-access article distributed under the terms of the Creative Commons Attribution License, which permits unrestricted use, distribution, and reproduction in any medium, provided the original author and source are credited.

**Funding:** AV, MR, CW, TH, MS, and RA are funded by the Rush Foundation. AV, MR, CW, and LH are also funded by the STRIVE (Tackling the Structural Drivers of the HIV Epidemic) Research Programme Consortium, funded by the UK Department for International Development. The opinions expressed are those of the authors alone and do not necessarily represent the views or policies of the funding organizations. The funders had no role in the analysis, decision to publish, or preparation of the manuscript.

**Competing Interests:** TH is a member of the Editorial Board of *PLOS Medicine*. All other authors have declared that no competing interests exist.

\* E-mail: Anna.Vassall@lshtm.ac.uk

**Provenance:** Not commissioned; externally peer reviewed



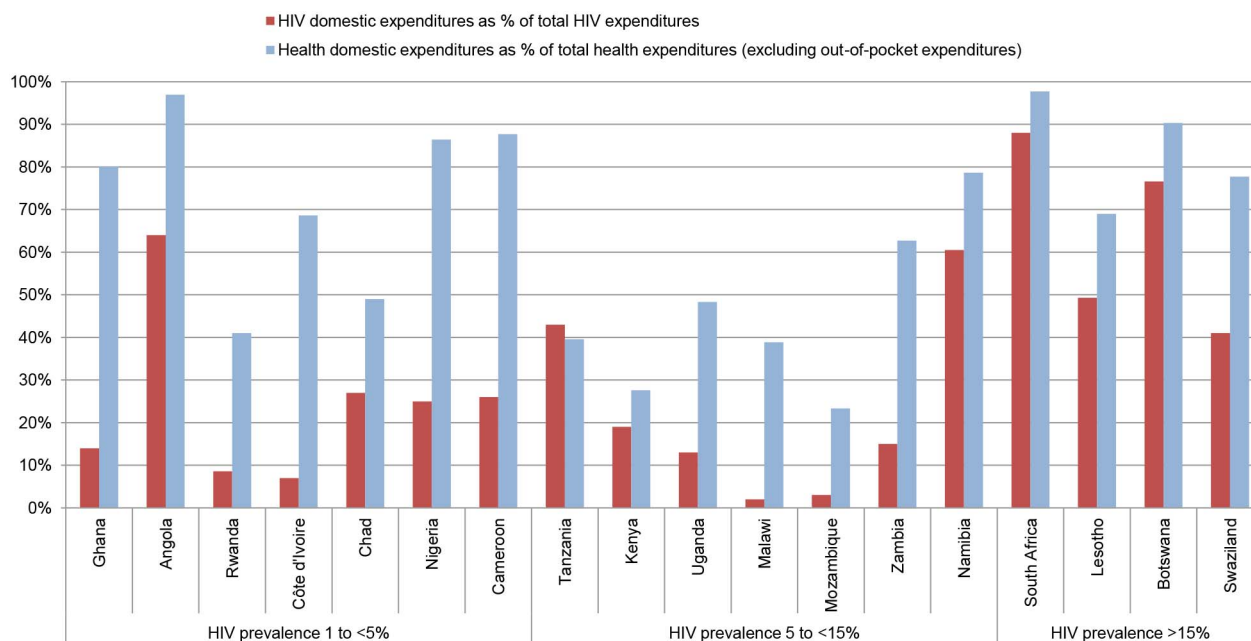

**Figure 2. Share of domestic financing in HIV and health expenditures.** Countries with the largest numbers of people living with HIV (UNAIDS 2011 estimates) were selected, up until the point where all countries with double-digit HIV prevalence rates were included. Sources: WHO's Global Health Expenditure Database [10] and UNAIDS AIDSinfo database [33]. Countries are ordered from lowest to highest adult HIV prevalence (2011 estimates). HIV spending is from the latest year available (2005–2011), while health expenditure data are 2011 estimates. doi:10.1371/journal.pmed.1001567.g002

However, none of these options is without challenges. Earmarking restricts the ability of governments to allocate funds efficiently across sectors, and may create a disincentive to use broader tax revenues to fund the HIV response. Health insurance presents considerable challenges in terms of ensuring sustainability, equity, and financing the care of chronic illness. Each of these options therefore needs to be carefully evaluated within the broader framework of health financing reform and on a country-by-country basis.

In addition, between 1990 and 2010, innovative approaches for raising external financing for health in low- and middle-income countries totalled US\$6.3 billion, including solidarity levies from global taxes (US\$970 million, of which US\$580 million was from an airline ticket tax) and funding from novel financing instruments such as Innovative Financing for Immunisation (US\$3.7 billion) [21]. Developing these approaches and other sources and the platforms that support them (GAVI, GFATM, UNITAID, etc.) may offer further opportunities for greater and more efficient financing from external sources in the future [22].

### Prioritising Health and HIV

Financing the HIV response must also be achieved without damaging

investments in health systems more broadly and other development sectors that are essential for social welfare (in turn addressing a number of the barriers to scaling up the HIV response) [5]. An HIV programme may have important external benefits for sexual and reproductive health; maternal and child health; or provide the necessary health system platforms for managing chronic conditions [23]. Similarly, investments in strengthening health systems or addressing related co-morbidities that compound HIV vulnerability or worsen treatment outcomes are critically important to individuals living with HIV. Although core HIV interventions have been demonstrated to be cost-effective, total HIV spending in sub-Saharan African countries was an estimated 19.4% of total health spending in 2007 (range: 0.7%–64.4%). This amount exceeds the relative burden of HIV disability-adjusted life years (DALYs) [24] and is at least partly due to the relatively high costs of HIV treatment compared to treatment for other prevalent diseases. There remains a difference between the amount spent on the HIV response across countries with a similar GDP per capita and HIV prevalence (Figure 3), and more work is required to understand the optimal level of domestic resourcing for HIV, given competing health sector priorities.

However, few countries have reached the Abuja target of a 15% allocation of the government budget to health (Figure 4) [16], suggesting that for countries like Kenya or Mozambique, where the health sector receives less than 8% of the national budget, organisations working in HIV need to work with others to argue for a re-prioritisation of health more broadly. Ministries of finance (and donors) can be reluctant to allocate more resources to the health sector, when funds remain unspent. Even with political will, limited capacity to effectively spend funds in the health sector can lead to chronic under-spending [25], further illustrating the importance of ensuring that key bottlenecks in broader health systems are fully addressed.

Unfortunately, earmarked external HIV funds have tended to create a sectoral “silo” mentality, which has led HIV programmes to miss out on the many potential synergies within health and with other development sectors. It is now critical to take advantage of the wider benefits generated by some HIV investments and adopt new co-financing approaches between HIV and broader development programmes. For example, programmes that improve livelihood opportunities or help keep young girls in school may yield HIV as well as development benefits [20]. However, at present, the sector-specific perspectives that

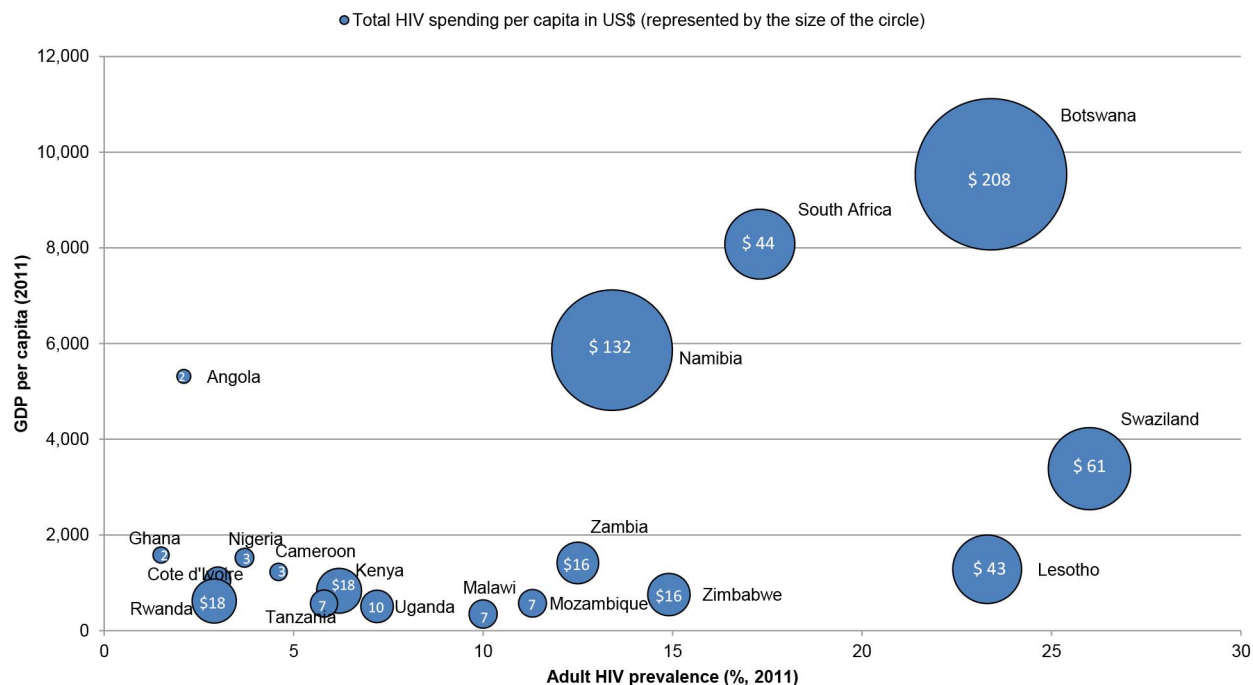

**Figure 3. Per capita HIV spending in relation to wealth and disease burden.** Countries with the largest numbers of people living with HIV (UNAIDS 2011 estimates) were selected, up until the point where all countries with double-digit HIV prevalence rates were included. Sources: World Bank's World Development Indicators Database [34] and the UNAIDS AIDSinfo database [33]. Adult HIV prevalence and GDP per capita are 2011 estimates, while HIV per capita spending is from the latest year available (2005–2011), but it is unclear from AIDSinfo which currency year is used. doi:10.1371/journal.pmed.1001567.g003

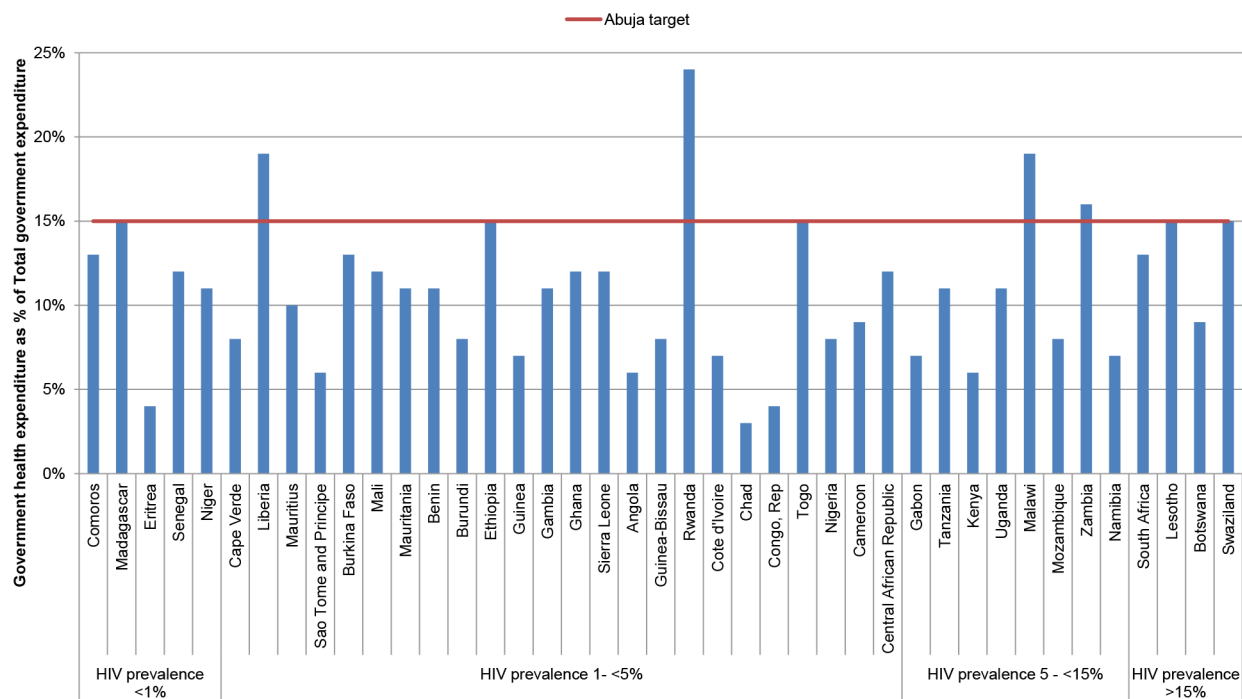

**Figure 4. Prioritisation of health in government expenditures.** Sources: WHO's Global Health Expenditure Database (2011 estimates for health) [10]. Countries are ordered from lowest to highest adult HIV prevalence (UNAIDS 2011 estimates). doi:10.1371/journal.pmed.1001567.g004

dominate priority-setting are not designed to recognise and harness such opportunities [26]. Interventions with direct HIV outcomes may, for example, appear more attractive than interventions that could have more structural and long-term benefits for the health or government system as a whole [27]. Approaches through which various sectors pool funds or engage in joint budgeting to fund interventions with multi-sectoral benefits can be found in high-income countries [28], and are worth exploring.

### Efficiency Gains within HIV Programmes

Advocacy pleas for continued funding for the HIV response will also no longer be sufficient without parallel demands for increased efficiency in their use [5]. Improving efficiency is about preventing more new infections and saving more lives by doing the right things for the right populations, as well as delivering quality services at the lowest cost. The World Health Organisation (WHO) estimates that 20%–40% of all resources spent on health are wasted through leakages, inefficient combinations of interventions, and sub-optimal use of medicines and human resources [16]. Good governance is a prerequisite given that sustaining financing from both domestic and external financing sources is hard to justify when a substantial leakage of funds exists [29]. Blueprint HIV programmes may have resulted in inefficiencies in resource allocation between different HIV interventions, and left some highly vulnerable groups under-served [30]. Increased attention needs to be placed on prioritising those interventions with proven effectiveness resulting in the best patient and population-level outcomes within the resources available. While there has been success in recent years in improving the efficiency of HIV service providers [2], programme costs still require careful scrutiny. Reducing the distortions and duplication inherent in parallel management systems [27]—originally necessary to initiate the rapid scale-up of

HIV services—could help redirect scarce resources towards direct service delivery. Improved organisational structures (for example providing integrated service platforms) and community-based delivery may also reduce costs to the health system and patients [5,31], but these gains have yet to be demonstrated at scale.

### Future Policy and Research Agenda

Adjusting to this new and complex reality will require a concerted global effort to support countries to fully institutionalise their response within domestic governance structures, and move beyond a silo HIV approach. Domestic finance ministries, who will increasingly be at the front-line of the fight against HIV, will need to be supported with new economic, epidemiological, and developmental evidence on how to harness each of these potential areas for increased financing in a way that reflects their national contexts.

This effort will not be without major technical, political, and economic challenges. The magnitude of the conflict between current commitment levels and long term fiscal liabilities is substantial. Increasing domestic financing, improving efficiency, and adopting a bold and innovative financing framework will be central to success. However, none of these options are easy for governments to implement. Increasing domestic financing, particularly in low-income countries, will require creative solutions to ensure the poor are not negatively affected. In some middle-income countries, efforts to increase domestic financing will require a paradigm shift in the HIV community; moving away from highlighting resource needs, towards participating in national planning processes and offering solutions that resonate with those working in broader development policy.

Efforts to improve efficiency will require impartiality to examine trade-offs from spending in one area of HIV response compared to others, some of which may

be unpalatable to different domestic interest groups. HIV programmes will need to conduct an open, critical examination of their relative costs compared to other development programmes. In order for donors to champion additional external financing, collaboration, rather than competition, with other development orientated interest groups will be required. The relationship between donors and national governments will need to be carefully navigated and may become increasingly complex as governance becomes central to any offer of co-financing. Finally, the same level of innovation that has produced some of the best HIV technologies will now be required to fund and sustain their use.

To address these challenges there is now an accentuated need for more and better evidence that speaks to the needs of policymakers at the country level. Key evidence gaps include: better understanding how the HIV response can interact with the broader health system and other development sectors; the accurate estimation of the magnitude of the current and future fiscal commitments and financing gaps; and evaluating opportunities for optimising efficiency in service delivery and new financing modalities. The global economic crisis and the hope of ending AIDS do not justify a reduction in our efforts. Rather, there is need for a renewed economic case to now be made—alongside the moral one—for a reinvigorated response and a sustainable, long-term national and global commitment to ending AIDS.

### Author Contributions

Analyzed the data: AV MR CW TH MS PV FT-P MH LH AH RA PP. Wrote the first draft of the manuscript: AV MR CW. Contributed to the writing of the manuscript: AV MR CW TH MS PV FT-P MH LH AH RA PP. ICMJE criteria for authorship read and met: AV MR CW TH MS PV FT-P MH LH AH RA PP. Agree with manuscript results and conclusions: AV MR CW TH MS PV FT-P MH LH AH RA PP.

### References

- Lozano R, Naghavi M, Foreman K, Lim S, Shibuya K, et al. (2012) Global and regional mortality from 235 causes of death for 20 age groups in 1990 and 2010: a systematic analysis for the Global Burden of Disease Study 2010. *Lancet* 380: 2095–2128.
- UNAIDS (2012) Global report: UNAIDS report on the global AIDS epidemic 2012. Geneva: UNAIDS.
- WHO (2011) Progress in scale-up of male circumcision for HIV prevention in Eastern and Southern Africa: focus on service delivery - 2011. Geneva: World Health Organization.
- Seeley J, Watts CH, Kippax S, Russell S, Heise L, et al. (2012) Addressing the structural drivers of HIV: a luxury or necessity for programmes? *J Int AIDS Soc* 15 Suppl 1: 1–4.
- Schwartländer B, Stover J, Hallett T, Atun R, Avila C, et al. (2011) Towards an improved investment approach for an effective response to HIV/AIDS. *Lancet* 377: 2031–2041.
- Lule E, Haacker M (2012) The fiscal dimension of HIV/AIDS in Botswana, South Africa, Swaziland, and Uganda. Washington (D.C.): The World Bank.
- UNAIDS (2012) Together we will end AIDS. Geneva: Joint United Nations Programme on HIV/AIDS (UNAIDS).
- Heller PS (2006) The prospects of creating ‘fiscal space’ for the health sector. *Health Policy Plan* 21: 75–79.
- Drummond P, Daal W, Srivastava N, Oliveira LE (2012) Mobilizing revenue in Sub-Saharan Africa: empirical norms and key determinants. Washington (D.C.): International Monetary Fund.
- WHO (2013) Global Health Expenditure Database. Geneva: World Health Organization.

Available: <http://apps.who.int/nha/database/PreDataExplorer.aspx?d=1>. Accessed 11 April 2013.

11. International Monetary Fund (2011) Revenue mobilization in developing countries. Fiscal affairs department, international monetary fund (IMF). Washington (D.C.): International Monetary Fund.
12. Resch S, Korenromp E, Stover J, Blakley M, Krubiner C, et al. (2011) Economic returns to investment in AIDS treatment in low and middle income countries. *PLoS One* 6: e25310. doi:10.1371/journal.pone.0025310
13. Leach-Kemon K, Chou DP, Schneider MT, Tardif A, Dieleman JL, et al. (2012) The global financial crisis has led to a slowdown in growth of funding to improve health in many developing countries. *Health Aff (Millwood)* 31: 228–235.
14. Lancet (2013) Health and the post-2015 development agenda. *Lancet* 381: 699.
15. Hecht R, Stover J, Bollinger L, Muhib F, Case K, et al. (2010) Financing of HIV/AIDS programme scale-up in low-income and middle-income countries, 2009–31. *Lancet* 376: 1254–1260.
16. World Health Organization (2010) The World Health Report: health systems financing: the path of universal coverage. Geneva: World Health Organization.
17. Lu C, Schneider MT, Gubbins P, Leach-Kemon K, Jamison D, et al. (2010) Public financing of health in developing countries: a cross-national systematic analysis. *Lancet* 375: 1375–1387.
18. GFATM (2011) Policy on eligibility criteria, counterpart financing requirements, and prioritization of proposals for funding from the global fund. Geneva: The Global Fund to Fight AIDS, Tuberculosis and Malaria.
19. PEPFAR (2009) Guidance for PEPFAR Partnership Frameworks and Partnership Framework Implementation Plans, Version 2.0. Washington (D.C.): United States President's Emergency Plan for AIDS Relief.
20. Vassall A, Remme M, Watts C (2012) Social policy interventions to enhance the HIV/AIDS response in Sub-Saharan Africa. Lomborg B, editor. *Rethink HIV: smarter ways to invest in ending HIV in Sub-Saharan Africa*. Cambridge: Cambridge University Press.
21. Atun R, Knaul FM, Akachi Y, Frenk J (2012) Innovative financing for health: what is truly innovative? *Lancet* 380: 2044–2049.
22. Partners Advisory (2011) Tax on financial transactions - an implementation guide. Geneva: UNITAID.
23. Atun R, Jaffar S, Nishtar S, Knaul FM, Barreto ML, et al. (2013) Improving responsiveness of health systems to non-communicable diseases. *Lancet* 381: 690–697.
24. Amico P, Aran C, Avila C (2010) HIV spending as a share of total health expenditure: an analysis of regional variation in a multi-country study. *PLoS One* 5: e12997. doi:10.1371/journal.pone.0012997
25. Durairaj V, Evans DB (2010) Fiscal space for health in resource poor countries. World health report. Geneva: World Health Organization.
26. Remme M, Vassall A, Lutz B, Watts C (2012) Paying girls to stay in school: a good return on HIV investment? *Lancet* 379: 2150.
27. Travis P, Bennett S, Haines A, Pang T, Bhutta Z, et al. (2004) Overcoming health-systems constraints to achieve the Millennium Development Goals. *Lancet* 364: 900–906.
28. Johansson P, Tillgren P (2011) Financing intersectoral health promotion programmes: some reasons why collaborators are collaborating as indicated by cost-effectiveness analyses. *Scand J Public Health* 39: 26–32.
29. Zeng W, Shepard DS, Chilingerian J, Avila-Figueroa C (2012) How much can we gain from improved efficiency? An examination of performance of national HIV/AIDS programs and its determinants in low- and middle-income countries. *BMC Health Serv Res* 12: 74.
30. Izazola-Licea JA, Wiegmann J, Aran C, Guthrie T, De Lay P, et al. (2009) Financing the response to HIV in low-income and middle-income countries. *J Acquir Immune Defic Syndr* 52 Suppl 2: S119–126.
31. Jaffar S, Amuron B, Foster S, Birungi J, Levin J, et al. (2009) Rates of virological failure in patients treated in a home-based versus a facility-based HIV-care model in Jinja, southeast Uganda: a cluster-randomised equivalence trial. *Lancet* 374: 2080–2089.
32. IMF (2012) International Monetary Fund World Economic Outlook Database. Available: <http://www.imf.org/external/pubs/ft/weo/2012/02/weodata/weoselgr.aspx>. Accessed 11 April 2013.
33. UNAIDS (2013) UNAIDS AIDSInfo online database. Available: <http://www.aidsinfoonline.org/devinfo/libraries.aspx/Home.aspx>. Accessed 11 April 2013.
34. World Bank (2013) World Bank's World Development Indicators Database. Available: <http://data.worldbank.org/indicator>. Accessed 11 April 2013.
